# Supplementary material for: Mendelian Randomization Analyses of Chronic Immune-Mediated Diseases, Circulating Inflammatory Biomarkers, and Cytokines in Relation to Liver Cancer
Source: MDPI journal article supplement (doi:10.3390/cancers15112930), 2023-05-26
Supplement: s1 [file s1]

**Supplementary materials**

**Mendelian Randomization Analyses of Chronic Immune-Mediated Diseases, Circulating Inflammatory Biomarkers, and Cytokines in Relation to Liver Cancer**

Table of content

Table S1. GWAS information for eight immune-mediated diseases. .... 2

Table S2. GWAS information for circulating inflammatory biomarkers. .... 5

Table S3. Associations of circulating inflammatory cytokines with liver cancer according to Mendelian randomization analysis. .... 6

Table S4. Associations of inflammatory traits with liver cancer (UKBB) according to Mendelian randomization analysis..... 13

Table S1. GWAS information for eight immune-mediated diseases.

| Chronic immune-mediated disease | GWAS information |             |             |                 |              |                            |                                                                                                                                                 |                                                                                                                                                                                                                                                                                                                                                                                   |
|---------------------------------|------------------|-------------|-------------|-----------------|--------------|----------------------------|-------------------------------------------------------------------------------------------------------------------------------------------------|-----------------------------------------------------------------------------------------------------------------------------------------------------------------------------------------------------------------------------------------------------------------------------------------------------------------------------------------------------------------------------------|
|                                 | PMID             | Case number | Sample size | SNPs passing QC | Web source*  | Source of study population | Case definitions                                                                                                                                | GWAS analysis                                                                                                                                                                                                                                                                                                                                                                     |
| Asthma                          | 32296059         | 64,538      | 303,859     | 9,572,556       | GCST010042   | The UK Biobank cohort      | Doctor diagnosed asthma, International Classification of Diseases version-10 (ICD10) J45 (asthma)/J46 (severe asthma), and self-reported asthma | A GWAS analysis was performed with BOLT-LMM v2.3.2 using a standard (infinitesimal) mixed model to correct for structure due to relatedness, ancestral heterogeneity, with adjustment for age, sex, the first 20 principal components, and genotyping array                                                                                                                       |
| Rheumatoid arthritis            | 33310728         | 14,361      | 58,284      | 13,108,512      | GCST90013534 | 18 studies of Europeans    | NR                                                                                                                                              | Associations of SNPs with rheumatoid arthritis were evaluated by logistic regression models assuming additive effects of the allele dosages including top 5 or 10 principal components as covariates (if available) using mach2dat v.1.0.16                                                                                                                                       |
| Type 1 diabetes                 | 34012112         | 18,942      | 520,580     | 62,116,689      | GCST90014023 | 19 studies of Europeans    | NR                                                                                                                                              | The authors tested variants with $MAF > 1e-5$ for association to T1D with Firth bias reduced logistic regression using EPACTS ( <a href="https://genome.sph.umich.edu/wiki/EPACTS">https://genome.sph.umich.edu/wiki/EPACTS</a> ) for non-UK Biobank cohorts or SAIGE (version 0.38) for the UK Biobank, using genotype dosages adjusted for sex and the first four ancestry PCs. |
| Psoriasis                       | 23143594         | 10,588      | 33,394      | 111,236         | GCST005527   | 5 studies of Europeans     | NR                                                                                                                                              | The GWAS data sets underwent quality control as previously described and were analyzed for association using the top principal components from the previous analyses as covariates                                                                                                                                                                                                |
| Crohn's disease                 | 28067908         | 12,194      | 40,266      | 9,560,910       | GCST004132   | a UK cohort                | diagnosed using accepted endoscopic, histopathological and radiological criteria                                                                | The authors tested for association with ulcerative colitis, Crohn's disease and IBD separately within the sequenced samples and new GWAS using                                                                                                                                                                                                                                    |

|                              |          |        |        |           |            |                                                                                                              |                                                                                                                                                          |                                                                                                                                                                                                                                                                                                                                   |
|------------------------------|----------|--------|--------|-----------|------------|--------------------------------------------------------------------------------------------------------------|----------------------------------------------------------------------------------------------------------------------------------------------------------|-----------------------------------------------------------------------------------------------------------------------------------------------------------------------------------------------------------------------------------------------------------------------------------------------------------------------------------|
|                              |          |        |        |           |            |                                                                                                              |                                                                                                                                                          | SNPTEST v2.5, performing an additive frequentist association test conditioned on the first ten principal components for each cohort.                                                                                                                                                                                              |
| Ulcerative colitis           | 28067908 | 12,366 | 45,975 | 9,578,670 | GCST004133 | a UK cohort                                                                                                  | diagnosed using accepted endoscopic, histopathological and radiological criteria                                                                         | The authors tested for association with ulcerative colitis, Crohn's disease and IBD separately within the sequenced samples and new GWAS using SNPTEST v2.5, performing an additive frequentist association test conditioned on the first ten principal components for each cohort.                                               |
| Celiac disease               | 20190752 | 4,533  | 15,283 | 292,387   | GCST000612 | an European cohort                                                                                           | Affected celiac individuals were diagnosed according to standard clinical, serological and histopathological criteria, including small intestinal biopsy | Analyses were performed using PLINK v1.07, mostly using the Cochran-Mantel-Haenzel test.                                                                                                                                                                                                                                          |
| Multiple sclerosis           | 24076602 | 14,198 | 38,582 | 161,311   | GCST005531 | International Multiple Sclerosis Genetics Consortium (IMSGC)                                                 | NR                                                                                                                                                       | The authors applied logistic regression, assuming a per-allelic genetic model for each data set, including the first five principal components as covariates to correct for population stratification, and then performed an inverse variance meta-analysis of the 11 strata under a fixed-effects model, as implemented in PLINK |
| Systemic lupus erythematosus | 26502338 | 5,201  | 14,267 | 644,674   | GCST003156 | From southern Europe, matching the Spanish, Italian and Turkish cases with controls from the same countries. | Diagnosed on the basis of standard American College of Rheumatology (ACR) classification criteria                                                        | All case-control analysis was carried out using the SNPTEST algorithm; we used a standard threshold of $P = 5 \times 10^{-8}$ for reporting genome-wide significance throughout. The inverse variance method was used for meta-analysis.                                                                                          |

|               |          |        |        |            |            |                                                                                                                                   |                                                                                                                                                                                              |                                                                                                                                                                                                                                                                                                                                               |
|---------------|----------|--------|--------|------------|------------|-----------------------------------------------------------------------------------------------------------------------------------|----------------------------------------------------------------------------------------------------------------------------------------------------------------------------------------------|-----------------------------------------------------------------------------------------------------------------------------------------------------------------------------------------------------------------------------------------------------------------------------------------------------------------------------------------------|
| Periodontitis | 31235808 | 17,353 | 45,563 | >8,900,000 | GCST008300 | 17,353 European and Hispanic/Latino ancestry cases, 28,210 European and Hispanic/Latino ancestry controls in the GLIDE consortium | For periodontal status, participants were classified as having (cases) or not having (reference) clinical symptoms of periodontitis, using definitions applied by each participating cohort. | For the binary trait of periodontitis, age, age-squared and other study-specific covariates were instead included as covariates in association tests. Every genotyped and imputed SNP was tested for association with these transformed variables using linear regression and additive genetic models, implemented via several software tools |
|---------------|----------|--------|--------|------------|------------|-----------------------------------------------------------------------------------------------------------------------------------|----------------------------------------------------------------------------------------------------------------------------------------------------------------------------------------------|-----------------------------------------------------------------------------------------------------------------------------------------------------------------------------------------------------------------------------------------------------------------------------------------------------------------------------------------------|

\*All GWAS summary data were downloaded from GWAS Catalog. NR, not report.

Table S2. GWAS information for circulating inflammatory biomarkers.

| Biomarker name     | PMID     | Sample size | SNPs passing QC | Study populations                   | GWAS information                                                                                                                                                                                                                                                                                                                                                                                                                                                                                                                                                                                                                                                                                                                                                                                                                                       | Web source |
|--------------------|----------|-------------|-----------------|-------------------------------------|--------------------------------------------------------------------------------------------------------------------------------------------------------------------------------------------------------------------------------------------------------------------------------------------------------------------------------------------------------------------------------------------------------------------------------------------------------------------------------------------------------------------------------------------------------------------------------------------------------------------------------------------------------------------------------------------------------------------------------------------------------------------------------------------------------------------------------------------------------|------------|
| C-reactive protein | 33462484 | 362,443     | 801,7993        | The UK Biobank cohort               | The authors employed a GWAS with covariates of the population-specific PCs and the genotyping array on the residuals computed above. Variants were the full set of HRC-imputed SNPs in the version 3 UK Biobank data release.                                                                                                                                                                                                                                                                                                                                                                                                                                                                                                                                                                                                                          | Footnotes1 |
| Eosinophil count   | 27863252 | 172,275     | ~ 2,500,000     | The UK Biobank and INTERVAL studies | The authors performed a univariable GWAS for each of the 36 blood cell indices that had phenotype data measured or derived in all three studies. Specifically, we computed the association statistics (i.e an estimate of the regression coefficient and the corresponding standard error) for a mixed linear regression of phenotype on the probabilistic imputed allele dose (i.e., an additive model) separately for each of the three datasets using BOLT-LMM v2.2 (Loh et al., 2015). The linear mixed model accounts for the genetic component of phenotypic correlation generated by relatedness. In order to maximize protection against confounding by large scale relatedness, we included a dummy variable for each recruitment center and the first ten PCs of the study specific kinship matrices as covariates in each regression model. | GCST004606 |
| Leukocyte count    |          | 172,435     |                 |                                     |                                                                                                                                                                                                                                                                                                                                                                                                                                                                                                                                                                                                                                                                                                                                                                                                                                                        | GCST004610 |
| Basophil count     |          | 171,846     |                 |                                     |                                                                                                                                                                                                                                                                                                                                                                                                                                                                                                                                                                                                                                                                                                                                                                                                                                                        | GCST004618 |
| Lymphocyte count   |          | 171,643     |                 |                                     |                                                                                                                                                                                                                                                                                                                                                                                                                                                                                                                                                                                                                                                                                                                                                                                                                                                        | GCST004627 |
| Monocyte count     |          | 170,721     |                 |                                     |                                                                                                                                                                                                                                                                                                                                                                                                                                                                                                                                                                                                                                                                                                                                                                                                                                                        | GCST004625 |
| Neutrophil count   |          | 170,702     |                 |                                     |                                                                                                                                                                                                                                                                                                                                                                                                                                                                                                                                                                                                                                                                                                                                                                                                                                                        | GCST004629 |

Footnotes1: [https://nih.figshare.com/articles/dataset/The\\_meta-analyzed\\_GWAS\\_summary\\_statistics\\_for\\_35\\_lab\\_biomarkers\\_described\\_in\\_Genetics\\_of\\_35\\_blood\\_and\\_urine\\_biomarkers\\_in\\_the\\_UK\\_Biobank\\_/12355382](https://nih.figshare.com/articles/dataset/The_meta-analyzed_GWAS_summary_statistics_for_35_lab_biomarkers_described_in_Genetics_of_35_blood_and_urine_biomarkers_in_the_UK_Biobank_/12355382)

Table S3. Associations of circulating inflammatory cytokines with liver cancer according to Mendelian randomization analysis.

| ID*            | Protein       | method     | No. of IVs | Biomarker              | Full name                       | Group            | OR (95% CI)                | P value       |
|----------------|---------------|------------|------------|------------------------|---------------------------------|------------------|----------------------------|---------------|
| 11593_21       | CXCL9         | IVW        | 4          | MIG                    | C-X-C motif chemokine 9         | Chemokine        | 1.37 (0.47 to 3.95)        | 0.5622        |
| 13748_4        | CCL8          | IVW        | 81         | MCP-2                  | C-C motif chemokine 8           | Chemokine        | 0.90 (0.78 to 1.04)        | 0.1611        |
| 18289_16       | CCL15         | IVW        | 54         | MIP-5                  | C-C motif chemokine 15          | Chemokine        | 0.98 (0.84 to 1.14)        | 0.7543        |
| 2192_63        | CCL27         | IVW        | 2          | CTACK                  | C-C motif chemokine 27          | Chemokine        | 1.55 (0.26 to 9.12)        | 0.6294        |
| <b>2436_49</b> | <b>CXCL16</b> | <b>IVW</b> | <b>41</b>  | <b>CXCL16, soluble</b> | <b>C-X-C motif chemokine 16</b> | <b>Chemokine</b> | <b>0.78 (0.61 to 1.00)</b> | <b>0.0463</b> |
| 2516_57        | CCL21         | IVW        | 56         | 6Ckine                 | C-C motif chemokine 21          | Chemokine        | 1.00 (0.83 to 1.21)        | 0.9727        |
| 2578_67        | CCL2          | IVW        | 4          | MCP-1                  | C-C motif chemokine 2           | Chemokine        | 0.41 (0.17 to 1.04)        | 0.0594        |
| 2705_5         | CCL25         | IVW        | 56         | TECK                   | C-C motif chemokine 25          | Chemokine        | 0.95 (0.81 to 1.11)        | 0.5255        |
| 2770_51        | CCL1          | IVW        | 22         | I-309                  | C-C motif chemokine 1           | Chemokine        | 0.97 (0.67 to 1.40)        | 0.8647        |
| 2781_63        | CCL4L1        | IVW        | 11         | LAG-1                  | C-C motif chemokine 4-like      | Chemokine        | 1.21 (0.77 to 1.90)        | 0.3989        |
| 2900_53        | CCL14         | IVW        | 30         | HCC-1                  | C-C motif chemokine 14          | Chemokine        | 1.00 (0.80 to 1.24)        | 0.9745        |
| 2913_1         | CCL23         | IVW        | 25         | MPIF-1                 | C-C motif chemokine 23          | Chemokine        | 0.98 (0.81 to 1.18)        | 0.7988        |
| 2979_8         | CXCL5         | IVW        | 8          | ENA-78                 | C-X-C motif chemokine 5         | Chemokine        | 1.00 (0.58 to 1.73)        | 0.9966        |
| 3038_9         | CXCL11        | IVW        | 36         | I-TAC                  | C-X-C motif chemokine 11        | Chemokine        | 0.94 (0.73 to 1.22)        | 0.6431        |
| 3040_59        | CCL3          | IVW        | 11         | MIP-1a                 | C-C motif chemokine 3           | Chemokine        | 1.07 (0.63 to 1.82)        | 0.8101        |
| 3044_3         | CCL18         | IVW        | 48         | PARC                   | C-C motif chemokine 18          | Chemokine        | 0.99 (0.84 to 1.17)        | 0.9046        |
| 3487_32        | CXCL13        | IVW        | 4          | BLC                    | C-X-C motif chemokine 13        | Chemokine        | 1.54 (0.34 to 7.00)        | 0.5774        |
| 3495_15        | CXCL6         | IVW        | 70         | GCP-2                  | C-X-C motif chemokine 6         | Chemokine        | 0.95 (0.82 to 1.11)        | 0.5343        |
| 3508_78        | CCL22         | IVW        | 33         | MDC                    | C-C motif chemokine 22          | Chemokine        | 1.09 (0.79 to 1.49)        | 0.6095        |
| 3519_3         | CCL17         | IVW        | 44         | TARC                   | C-C motif chemokine 17          | Chemokine        | 1.01 (0.83 to 1.24)        | 0.9014        |
| 4141_79        | CXCL10        | IVW        | 11         | IP-10                  | C-X-C motif chemokine 10        | Chemokine        | 0.89 (0.54 to 1.47)        | 0.6508        |
| 4144_13        | CCL13         | IVW        | 2          | MCP-4                  | C-C motif chemokine 13          | Chemokine        | 1.15 (0.29 to 4.62)        | 0.8433        |
| 4886_3         | CCL7          | IVW        | 42         | MCP-3                  | C-C motif chemokine 7           | Chemokine        | 1.13 (0.94 to 1.37)        | 0.2007        |
| 4913_78        | CCL16         | IVW        | 64         | HCC-4                  | C-C motif chemokine 16          | Chemokine        | 1.09 (0.95 to 1.24)        | 0.2192        |
| 4922_13        | CCL19         | IVW        | 26         | MIP-3b                 | C-C motif chemokine 19          | Chemokine        | 1.03 (0.78 to 1.35)        | 0.8466        |
| 5301_7         | CCL11         | IVW        | 28         | Eotaxin                | Eotaxin                         | Chemokine        | 1.22 (0.91 to 1.64)        | 0.1742        |
| 5480_49        | CCL5          | IVW        | 13         | RANTES                 | C-C motif chemokine 5           | Chemokine        | 1.03 (0.66 to 1.63)        | 0.8855        |

|          |         |            |    |           |                                               |               |                      |        |
|----------|---------|------------|----|-----------|-----------------------------------------------|---------------|----------------------|--------|
| 5730_60  | CXCL14  | Wald ratio | 1  | BRAK      | C-X-C motif chemokine 14                      | Chemokine     | 1.24 (0.17 to 8.87)  | 0.8273 |
| 9168_31  | CCL26   | IVW        | 7  | Eotaxin-3 | C-C motif chemokine 26                        | Chemokine     | 1.06 (0.52 to 2.17)  | 0.8743 |
| 9495_10  | CXCL17  | IVW        | 8  | VCC1      | C-X-C motif chemokine 17                      | Chemokine     | 1.04 (0.63 to 1.73)  | 0.8779 |
| 11219_95 | FGFBP3  | IVW        | 18 | FGFP3     | Fibroblast growth factor-binding protein 3    | Growth factor | 0.82 (0.57 to 1.17)  | 0.2678 |
| 13098_93 | FIGF    | IVW        | 6  | VEGF-D    | Vascular endothelial growth factor D          | Growth factor | 1.89 (0.86 to 4.18)  | 0.1156 |
| 13669_6  | FGFR3   | IVW        | 11 | FGFR-3    | Fibroblast growth factor receptor 3           | Growth factor | 0.81 (0.49 to 1.32)  | 0.3886 |
| 13724_27 | FGF19   | IVW        | 11 | FGF-19    | Fibroblast growth factor 19                   | Growth factor | 1.00 (0.68 to 1.49)  | 0.9874 |
| 15494_11 | FGFBP1  | IVW        | 9  | FGFP1     | Fibroblast growth factor-binding protein 1    | Growth factor | 1.12 (0.53 to 2.40)  | 0.7644 |
| 17166_4  | FGF8    | IVW        | 2  | FGF-8F    | Fibroblast growth factor 8 isoform F          | Growth factor | 0.45 (0.04 to 4.74)  | 0.5102 |
| 2597_8   | VEGFA   | IVW        | 51 | VEGF      | Vascular endothelial growth factor A          | Growth factor | 0.94 (0.78 to 1.13)  | 0.5032 |
| 2681_23  | HGF     | IVW        | 6  | HGF       | Hepatocyte growth factor                      | Growth factor | 0.74 (0.37 to 1.47)  | 0.3873 |
| 2761_49  | FGF18   | Wald ratio | 1  | FGF-18    | Fibroblast growth factor 18                   | Growth factor | 1.26 (0.14 to 10.94) | 0.8362 |
| 2763_66  | FGF20   | IVW        | 3  | FGF-20    | Fibroblast growth factor 20                   | Growth factor | 1.08 (0.21 to 5.41)  | 0.9285 |
| 2966_65  | CLEC11A | IVW        | 40 | SCGF-beta | Stem cell growth factor-beta                  | Growth factor | 0.99 (0.74 to 1.30)  | 0.9158 |
| 3025_50  | FGF2    | IVW        | 54 | bFGF      | Fibroblast growth factor 2                    | Growth factor | 1.06 (0.87 to 1.30)  | 0.5474 |
| 3065_65  | FGF5    | IVW        | 4  | FGF-5     | Fibroblast growth factor 5                    | Growth factor | 0.93 (0.41 to 2.13)  | 0.8619 |
| 3132_1   | VEGFC   | Wald ratio | 1  | VEGF-C    | Vascular endothelial growth factor C          | Growth factor | 1.04 (0.53 to 2.04)  | 0.9006 |
| 3486_58  | FGF1    | IVW        | 4  | b-ECGF    | Fibroblast growth factor 1                    | Growth factor | 1.12 (0.41 to 3.04)  | 0.8209 |
| 3494_71  | FGF17   | IVW        | 6  | FGF-17    | Fibroblast growth factor 17                   | Growth factor | 1.21 (0.60 to 2.43)  | 0.5990 |
| 3617_80  | HGFAC   | IVW        | 66 | HGFA      | Hepatocyte growth factor activator            | Growth factor | 1.00 (0.87 to 1.15)  | 0.9876 |
| 3651_50  | KDR     | IVW        | 42 | VEGF sR2  | Vascular endothelial growth factor receptor 2 | Growth factor | 0.89 (0.74 to 1.08)  | 0.2285 |
| 3807_1   | FGF23   | IVW        | 2  | FGF23     | Fibroblast growth factor 23                   | Growth factor | 3.81 (0.51 to 28.54) | 0.1929 |
| 3808_76  | FGFR2   | IVW        | 2  | FGFR-2    | Fibroblast growth factor receptor 2           | Growth factor | 0.25 (0.04 to 1.59)  | 0.1411 |
| 4123_60  | FGF4    | Wald ratio | 1  | FGF-4     | Fibroblast growth factor 4                    | Growth factor | 0.13 (0.00 to 5.83)  | 0.2891 |
| 4392_54  | FGF12   | IVW        | 2  | FGF-12    | Fibroblast growth factor 12                   | Growth factor | 0.82 (0.15 to 4.42)  | 0.8133 |
| 4393_3   | FGF16   | IVW        | 2  | FGF-16    | Fibroblast growth factor 16                   | Growth factor | 1.24 (0.22 to 7.07)  | 0.8097 |
| 4487_1   | FGF7    | IVW        | 3  | FGF7      | Fibroblast growth factor 7                    | Growth factor | 0.55 (0.09 to 3.40)  | 0.5175 |
| 4988_49  | FGFR4   | IVW        | 6  | FGFR4     | Fibroblast growth factor receptor 4           | Growth factor | 0.70 (0.30 to 1.59)  | 0.3904 |
| 5532_53  | FGFR1   | IVW        | 19 | bFGF-R    | Fibroblast growth factor receptor 1           | Growth factor | 1.31 (0.82 to 2.08)  | 0.2529 |

|           |        |            |    |              |                                               |               |                      |        |
|-----------|--------|------------|----|--------------|-----------------------------------------------|---------------|----------------------|--------|
| 5801_72   | NGF    | Wald ratio | 1  | b-NGF        | beta-nerve growth factor                      | Growth factor | 0.91 (0.12 to 7.04)  | 0.9286 |
| 6237_11   | FGFRL1 | IVW        | 4  | FGRL1        | Fibroblast growth factor receptor-like 1      | Growth factor | 0.61 (0.20 to 1.83)  | 0.3807 |
| 7894_155  | FGF3   | IVW        | 3  | FGF-3        | Fibroblast growth factor 3                    | Growth factor | 1.15 (0.43 to 3.06)  | 0.7783 |
| 16315_105 | FLT1   | IVW        | 27 | VEGF sR1     | Vascular endothelial growth factor receptor 1 | Growth factor | 1.06 (0.80 to 1.40)  | 0.6848 |
| 9453_12   | VEGFB  | Wald ratio | 1  | VEGF-B       | Vascular endothelial growth factor B          | Growth factor | 1.07 (0.16 to 7.32)  | 0.9445 |
| 14127_240 | IFNB1  | IVW        | 2  | IFN-b        | Interferon beta                               | Interferon    | 1.42 (0.29 to 6.87)  | 0.6645 |
| 14128_121 | IFNA10 | IVW        | 3  | IFN10        | Interferon alpha-10                           | Interferon    | 1.25 (0.42 to 3.70)  | 0.6812 |
| 14129_1   | IFNA7  | Wald ratio | 1  | IFNA7        | Interferon alpha-7                            | Interferon    | 0.22 (0.01 to 4.11)  | 0.3083 |
| 15346_31  | IFNG   | IVW        | 5  | IFN-g        | Interferon gamma                              | Interferon    | 1.18 (0.61 to 2.25)  | 0.6264 |
| 15405_23  | IFNA4  | IVW        | 3  | IFNA4        | Interferon alpha-4                            | Interferon    | 1.18 (0.39 to 3.57)  | 0.7704 |
| 18389_11  | IFNA1  | IVW        | 3  | IFNA1        | Interferon alpha-1/13                         | Interferon    | 1.40 (0.46 to 4.28)  | 0.5505 |
| 3497_13   | IFNA2  | IVW        | 8  | IFN-aA       | Interferon alpha-2                            | Interferon    | 1.05 (0.65 to 1.69)  | 0.8413 |
| 4396_54   | IFNL1  | IVW        | 2  | IFN-lambda 1 | Interferon lambda-1                           | Interferon    | 1.24 (0.22 to 7.13)  | 0.8109 |
| 4397_26   | IFNL2  | IVW        | 2  | IFN-lambda 2 | Interferon lambda-2                           | Interferon    | 1.18 (0.27 to 5.13)  | 0.8248 |
| 5713_9    | IFNL3  | IVW        | 5  | IFN-lambda 3 | Interferon lambda-3                           | Interferon    | 1.92 (0.70 to 5.23)  | 0.2035 |
| 5714_88   | IFNA6  | IVW        | 4  | IFNA6        | Interferon alpha-6                            | Interferon    | 1.07 (0.44 to 2.59)  | 0.8813 |
| 5825_49   | IFNGR1 | IVW        | 5  | IFN-g R1     | Interferon gamma receptor 1                   | Interferon    | 1.23 (0.39 to 3.89)  | 0.7200 |
| 6210_100  | IFNA5  | IVW        | 11 | IFNA5        | Interferon alpha-5                            | Interferon    | 0.89 (0.55 to 1.44)  | 0.6356 |
| 7180_114  | IFNA14 | IVW        | 2  | IFN14        | Interferon alpha-14                           | Interferon    | 1.38 (0.35 to 5.47)  | 0.6467 |
| 7192_37   | IFNLR1 | IVW        | 6  | CRF2-12      | Interferon lambda receptor 1                  | Interferon    | 0.70 (0.38 to 1.29)  | 0.2514 |
| 8818_13   | IFNGR2 | Wald ratio | 1  | INGR2        | Interferon gamma receptor 2                   | Interferon    | 0.25 (0.02 to 3.66)  | 0.3083 |
| 9183_7    | IFNAR1 | IVW        | 50 | IFN-a/b R1   | Interferon alpha/beta receptor 1              | Interferon    | 0.89 (0.75 to 1.04)  | 0.1437 |
| 10344_334 | IL10RA | IVW        | 23 | IL-10 Ra     | Interleukin-10 receptor subunit alpha         | Interleukin   | 0.85 (0.63 to 1.13)  | 0.2579 |
| 10455_196 | IL31   | IVW        | 22 | IL-31        | Interleukin-31                                | Interleukin   | 0.77 (0.54 to 1.11)  | 0.1659 |
| 11071_1   | IL5    | IVW        | 3  | IL-5         | Interleukin-5                                 | Interleukin   | 1.20 (0.28 to 5.13)  | 0.8077 |
| 12665_16  | ILF2   | Wald ratio | 1  | ILF2         | Interleukin enhancer-binding factor 2         | Interleukin   | 1.27 (0.13 to 12.44) | 0.8362 |
| 12759_47  | ILF3   | IVW        | 3  | DRBP76       | Interleukin enhancer-binding factor 3         | Interleukin   | 1.15 (0.37 to 3.56)  | 0.8084 |
| 13435_31  | IL20RB | IVW        | 12 | IL-20 Rb     | Interleukin-20 receptor subunit beta          | Interleukin   | 1.12 (0.64 to 1.95)  | 0.6926 |
| 13686_2   | IL5RA  | IVW        | 57 | IL-5 Ra      | Interleukin-5 receptor subunit alpha          | Interleukin   | 0.83 (0.68 to 1.01)  | 0.0626 |



|          |         |            |    |            |                                            |             |                     |        |
|----------|---------|------------|----|------------|--------------------------------------------|-------------|---------------------|--------|
| 13733_5  | IL12B   | IVW        | 52 | IL-12 p40  | Interleukin-12 subunit beta                | Interleukin | 0.96 (0.78 to 1.17) | 0.6549 |
| 13744_37 | IL3RA   | IVW        | 72 | IL-3 Ra    | Interleukin-3 receptor subunit alpha       | Interleukin | 1.05 (0.90 to 1.23) | 0.5538 |
| 14026_24 | IL17F   | IVW        | 5  | IL-17F     | Interleukin-17F                            | Interleukin | 1.04 (0.45 to 2.43) | 0.9242 |
| 14048_7  | IL1RAP  | IVW        | 69 | IL-1 R AcP | Interleukin-1 Receptor accessory protein   | Interleukin | 1.07 (0.95 to 1.19) | 0.2550 |
| 14054_17 | IL15RA  | IVW        | 42 | IL-15 Ra   | Interleukin-15 receptor subunit alpha      | Interleukin | 1.13 (0.91 to 1.40) | 0.2581 |
| 14079_14 | IL18R1  | IVW        | 66 | IL-18 Ra   | Interleukin-18 receptor 1                  | Interleukin | 0.93 (0.78 to 1.12) | 0.4621 |
| 14133_93 | IL1R2   | IVW        | 51 | IL-1 sRII  | Interleukin-1 receptor type 2              | Interleukin | 0.89 (0.70 to 1.12) | 0.3146 |
| 14149_9  | IL36B   | IVW        | 4  | IL-1F8     | Interleukin-36 beta                        | Interleukin | 1.37 (0.60 to 3.11) | 0.4504 |
| 14150_7  | IL36A   | IVW        | 22 | IL-1F6     | Interleukin-36 alpha                       | Interleukin | 1.04 (0.75 to 1.45) | 0.7948 |
| 15602_43 | IL6R    | IVW        | 99 | IL-6 sRa   | Interleukin-6 receptor subunit alpha       | Interleukin | 0.89 (0.79 to 1.00) | 0.0517 |
| 17356_34 | IL1F10  | IVW        | 5  | IL1FA      | Interleukin-1 family member 10             | Interleukin | 1.13 (0.41 to 3.11) | 0.8162 |
| 18216_22 | IL11RA  | IVW        | 35 | IL-11 RA   | Interleukin-11 receptor subunit alpha      | Interleukin | 0.90 (0.69 to 1.19) | 0.4629 |
| 18375_28 | IL1F5   | IVW        | 29 | IL-1F5     | Interleukin-36 receptor antagonist protein | Interleukin | 1.00 (0.74 to 1.35) | 0.9973 |
| 19568_17 | IL15    | IVW        | 9  | IL-15      | Interleukin-15                             | Interleukin | 0.93 (0.52 to 1.65) | 0.7980 |
| 2631_50  | IL10RB  | IVW        | 12 | IL-10 Rb   | Interleukin-10 receptor subunit beta       | Interleukin | 0.91 (0.59 to 1.39) | 0.6534 |
| 2632_5   | IL12RB1 | IVW        | 7  | IL-12 Rb1  | Interleukin-12 receptor subunit beta-1     | Interleukin | 1.08 (0.58 to 2.02) | 0.8048 |
| 2633_52  | IL13RA1 | IVW        | 2  | IL-13 Ra1  | Interleukin-13 receptor subunit alpha-1    | Interleukin | 0.99 (0.14 to 6.80) | 0.9896 |
| 2773_50  | IL10    | IVW        | 2  | IL-10      | Interleukin-10                             | Interleukin | 0.96 (0.18 to 5.17) | 0.9614 |
| 2778_10  | IL22    | Wald ratio | 1  | IL-22      | Interleukin-22                             | Interleukin | 0.45 (0.03 to 7.04) | 0.5668 |
| 2906_55  | IL4     | IVW        | 3  | IL-4       | Interleukin-4                              | Interleukin | 1.25 (0.38 to 4.16) | 0.7168 |
| 2991_9   | IL1R1   | IVW        | 34 | IL-1 sRI   | Interleukin-1 receptor type 1              | Interleukin | 0.99 (0.74 to 1.33) | 0.9674 |
| 2992_59  | IL17RA  | IVW        | 63 | IL-17 sR   | Interleukin-17 receptor A                  | Interleukin | 1.03 (0.92 to 1.16) | 0.5906 |
| 2993_1   | IL18RAP | IVW        | 5  | IL-18 Rb   | Interleukin-18 receptor accessory protein  | Interleukin | 1.39 (0.66 to 2.94) | 0.3838 |
| 2994_71  | IL1RL2  | IVW        | 6  | IL-1Rrp2   | Interleukin-1 receptor-like 2              | Interleukin | 0.83 (0.45 to 1.53) | 0.5524 |
| 3035_80  | IL19    | IVW        | 48 | IL-19      | Interleukin-19                             | Interleukin | 0.99 (0.86 to 1.13) | 0.8309 |
| 3037_62  | IL1B    | IVW        | 13 | IL-1b      | Interleukin-1 beta                         | Interleukin | 1.03 (0.77 to 1.37) | 0.8505 |
| 3070_1   | IL2     | IVW        | 5  | IL-2       | Interleukin-2                              | Interleukin | 0.46 (0.16 to 1.33) | 0.1507 |
| 3072_4   | IL13    | IVW        | 5  | IL-13      | Interleukin-13                             | Interleukin | 1.06 (0.50 to 2.24) | 0.8728 |
| 3073_51  | IL18BP  | IVW        | 10 | IL-18 BPa  | Interleukin-18-binding protein             | Interleukin | 1.15 (0.65 to 2.04) | 0.6312 |

|                 |               |            |           |                |                                                          |                    |                            |               |
|-----------------|---------------|------------|-----------|----------------|----------------------------------------------------------|--------------------|----------------------------|---------------|
| 3151_6          | IL2RA         | IVW        | 2         | IL-2 sRa       | Interleukin-2 receptor subunit alpha                     | Interleukin        | 1.27 (0.25 to 6.55)        | 0.7754        |
| 3321_2          | IL24          | Wald ratio | 1         | IL24           | Interleukin-24                                           | Interleukin        | 1.24 (0.16 to 9.83)        | 0.8378        |
| 3376_49         | IL17RD        | IVW        | 32        | IL-17 RD       | Interleukin-17 receptor D                                | Interleukin        | 1.07 (0.84 to 1.36)        | 0.6017        |
| 3447_64         | CXCL8         | IVW        | 7         | IL-8           | Interleukin-8                                            | Interleukin        | 0.85 (0.40 to 1.80)        | 0.6783        |
| 3499_77         | IL17B         | IVW        | 6         | IL-17B         | Interleukin-17B                                          | Interleukin        | 1.26 (0.55 to 2.92)        | 0.5860        |
| 3620_67         | IL22RA1       | IVW        | 7         | IL22RA1        | Interleukin-22 receptor subunit alpha-1                  | Interleukin        | 1.14 (0.62 to 2.09)        | 0.6658        |
| 3815_14         | IL12RB2       | Wald ratio | 1         | IL-12 RB2      | Interleukin-12 receptor subunit beta-2                   | Interleukin        | 0.09 (0.00 to 2.62)        | 0.1604        |
| 4136_40         | IL17D         | IVW        | 2         | IL-17D         | Interleukin-17D                                          | Interleukin        | 1.20 (0.35 to 4.13)        | 0.7751        |
| 4137_57         | IL25          | IVW        | 5         | IL-17E         | Interleukin-25                                           | Interleukin        | 0.82 (0.49 to 1.37)        | 0.4420        |
| 4138_25         | IL20          | Wald ratio | 1         | IL-20          | Interleukin-20                                           | Interleukin        | 1.21 (0.20 to 7.14)        | 0.8362        |
| 4140_3          | IL7           | IVW        | 3         | IL-7           | Interleukin-7                                            | Interleukin        | 1.12 (0.29 to 4.33)        | 0.8674        |
| 4234_8          | IL1RL1        | IVW        | 125       | IL-1 R4        | Interleukin-1 receptor-like 1                            | Interleukin        | 0.97 (0.85 to 1.10)        | 0.6414        |
| 4493_92         | IL11          | Wald ratio | 1         | IL-11          | Interleukin-11                                           | Interleukin        | 1.08 (0.28 to 4.09)        | 0.9131        |
| 4556_10         | IL34          | IVW        | 25        | IL-34          | Interleukin-34                                           | Interleukin        | 0.92 (0.66 to 1.28)        | 0.6176        |
| 4673_13         | IL6           | Wald ratio | 1         | IL-6           | Interleukin-6                                            | Interleukin        | 0.46 (0.05 to 4.65)        | 0.5128        |
| 4717_55         | IL3           | IVW        | 3         | IL-3           | Interleukin-3                                            | Interleukin        | 0.88 (0.22 to 3.44)        | 0.8489        |
| 4851_25         | IL1A          | Wald ratio | 1         | IL-1a          | Interleukin-1 alpha                                      | Interleukin        | 0.79 (0.07 to 9.44)        | 0.8513        |
| 5082_51         | IL1RAPL2      | IVW        | 3         | IL-1 sR9       | X-linked interleukin-1 receptor accessory protein-like 2 | Interleukin        | 1.29 (0.40 to 4.14)        | 0.6655        |
| 5085_18         | IL20RA        | Wald ratio | 1         | IL-20 Ra       | Interleukin-20 receptor subunit alpha                    | Interleukin        | 1.46 (0.14 to 15.65)       | 0.7567        |
| 5087_5          | IL22RA2       | IVW        | 49        | IL-22BP        | Interleukin-22 receptor subunit alpha-2                  | Interleukin        | 0.97 (0.79 to 1.20)        | 0.7819        |
| <b>5088_175</b> | <b>IL23R</b>  | <b>IVW</b> | <b>10</b> | <b>IL-23 R</b> | <b>Interleukin-23 receptor</b>                           | <b>Interleukin</b> | <b>0.60 (0.38 to 0.95)</b> | <b>0.0282</b> |
| 5089_11         | IL7R          | IVW        | 6         | IL-7 Ra        | Interleukin-7 receptor subunit alpha                     | Interleukin        | 1.21 (0.53 to 2.75)        | 0.6453        |
| <b>5132_71</b>  | <b>IL27RA</b> | <b>IVW</b> | <b>55</b> | <b>TCCR</b>    | <b>Interleukin-27 receptor subunit alpha</b>             | <b>Interleukin</b> | <b>1.16 (1.01 to 1.33)</b> | <b>0.0359</b> |
| 5353_89         | IL1RN         | IVW        | 8         | IL-1Ra         | Interleukin-1 receptor antagonist protein                | Interleukin        | 1.06 (0.63 to 1.78)        | 0.8254        |
| 5468_67         | IL17RC        | IVW        | 3         | IL-17 RC       | Interleukin-17 receptor C                                | Interleukin        | 1.27 (0.27 to 5.98)        | 0.7636        |
| 5661_15         | IL18          | Wald ratio | 1         | IL-18          | Interleukin-18                                           | Interleukin        | 1.65 (0.12 to 21.83)       | 0.7052        |
| 5834_18         | IL9           | IVW        | 5         | IL-9           | Interleukin-9                                            | Interleukin        | 0.95 (0.27 to 3.38)        | 0.9413        |
| 6262_14         | IL17RB        | IVW        | 5         | IL-17B R       | Interleukin-17 receptor B                                | Interleukin        | 0.52 (0.21 to 1.30)        | 0.1615        |
| 7124_18         | IL21          | IVW        | 18        | IL-21          | Interleukin-21                                           | Interleukin        | 1.06 (0.76 to 1.48)        | 0.7155        |

|          |           |            |    |             |                                                       |                       |                      |        |
|----------|-----------|------------|----|-------------|-------------------------------------------------------|-----------------------|----------------------|--------|
| 8273_84  | IL31RA    | IVW        | 4  | IL31R       | Interleukin-31 receptor subunit alpha                 | Interleukin           | 1.21 (0.39 to 3.71)  | 0.7397 |
| 9051_13  | IL32      | Wald ratio | 1  | IL32        | Interleukin-32                                        | Interleukin           | 1.12 (0.39 to 3.16)  | 0.8362 |
| 9117_4   | IL36G     | Wald ratio | 1  | IL-1F9      | Interleukin-36 gamma                                  | Interleukin           | 1.26 (0.14 to 11.08) | 0.8362 |
| 9170_24  | IL17A     | IVW        | 2  | IL-17A      | Interleukin-17A                                       | Interleukin           | 0.64 (0.12 to 3.48)  | 0.6021 |
| 9255_5   | IL17C     | IVW        | 5  | IL-17C      | Interleukin-17C                                       | Interleukin           | 1.29 (0.62 to 2.67)  | 0.4943 |
| 9343_16  | IL2RB     | IVW        | 16 | IL-2 sRb    | Interleukin-2 receptor subunit beta                   | Interleukin           | 1.12 (0.75 to 1.67)  | 0.5895 |
| 9366_54  | IL21R     | IVW        | 2  | IL-21 sR    | Interleukin-21 receptor                               | Interleukin           | 1.00 (0.30 to 3.26)  | 0.9958 |
| 13682_47 | CSF1R     | IVW        | 38 | M-CSF R     | Macrophage colony-stimulating factor 1 receptor       | Others                | 0.97 (0.67 to 1.39)  | 0.8634 |
| 2719_3   | CSF3R     | IVW        | 8  | G-CSF-R     | Granulocyte colony-stimulating factor receptor        | Others                | 1.08 (0.65 to 1.78)  | 0.7757 |
| 2925_9   | SERPINE1  | IVW        | 9  | PAI-1       | Plasminogen activator inhibitor 1                     | Others                | 0.51 (0.26 to 1.01)  | 0.0520 |
| 3738_54  | CSF1      | IVW        | 4  | CSF-1       | Macrophage colony-stimulating factor 1                | Others                | 1.05 (0.50 to 2.19)  | 0.9031 |
| 4840_73  | CSF3      | IVW        | 35 | G-CSF       | Granulocyte colony-stimulating factor                 | Others                | 0.99 (0.78 to 1.27)  | 0.9634 |
| 8221_19  | MIF       | IVW        | 2  | MIF         | Macrophage migration inhibitory factor                | Others                | 0.42 (0.09 to 1.92)  | 0.2601 |
| 11837_7  | TNFRSF18  | IVW        | 2  | GITR        | Tumor necrosis factor receptor superfamily member 18  | Tumor necrosis factor | 2.66 (0.42 to 17.01) | 0.3005 |
| 12563_2  | TNFAIP8   | IVW        | 4  | TFIP8       | Tumor necrosis factor alpha-induced protein 8         | Tumor necrosis factor | 1.40 (0.72 to 2.72)  | 0.3190 |
| 14009_65 | TNFAIP3   | IVW        | 5  | TNFAIP3     | Tumor necrosis factor alpha-induced protein 3         | Tumor necrosis factor | 0.70 (0.19 to 2.61)  | 0.5961 |
| 14025_18 | TNFRSF9   | IVW        | 3  | 4-1BB       | Tumor necrosis factor receptor superfamily member 9   | Tumor necrosis factor | 1.49 (0.47 to 4.77)  | 0.4971 |
| 14061_48 | TNFSF11   | IVW        | 7  | sRANKL      | Tumor necrosis factor ligand superfamily member 11    | Tumor necrosis factor | 1.00 (0.53 to 1.90)  | 0.9998 |
| 14121_24 | TNFRSF10D | IVW        | 8  | TRAIL R4    | Tumor necrosis factor receptor superfamily member 10D | Tumor necrosis factor | 0.94 (0.51 to 1.74)  | 0.8542 |
| 2654_19  | TNFRSF1A  | IVW        | 11 | TNF sR-I    | Tumor necrosis factor receptor superfamily member 1A  | Tumor necrosis factor | 1.16 (0.61 to 2.19)  | 0.6485 |
| 2665_26  | TNFRSF17  | IVW        | 21 | BCMA        | Tumor necrosis factor receptor superfamily member 17  | Tumor necrosis factor | 1.38 (0.90 to 2.12)  | 0.1348 |
| 2704_74  | TNFRSF13B | IVW        | 7  | TACI        | Tumor necrosis factor receptor superfamily member 13B | Tumor necrosis factor | 1.13 (0.65 to 1.97)  | 0.6635 |
| 2708_54  | TNFSF18   | IVW        | 10 | TNFSF18     | Tumor necrosis factor ligand superfamily member 18    | Tumor necrosis factor | 1.03 (0.67 to 1.58)  | 0.8980 |
| 2839_2   | TNFSF4    | IVW        | 3  | OX40 Ligand | Tumor necrosis factor ligand superfamily member 4     | Tumor necrosis factor | 1.40 (0.43 to 4.55)  | 0.5785 |
| 2968_61  | TNFSF15   | IVW        | 2  | TNFSF15     | Tumor necrosis factor ligand superfamily member 15    | Tumor necrosis factor | 4.04 (0.47 to 34.48) | 0.2013 |
| 3059_50  | TNFSF13B  | IVW        | 10 | BAFF        | Tumor necrosis factor ligand superfamily member 13B   | Tumor necrosis factor | 1.24 (0.61 to 2.49)  | 0.5517 |
| 3152_57  | TNFRSF1B  | IVW        | 10 | TNF sR-II   | Tumor necrosis factor receptor superfamily member 1B  | Tumor necrosis factor | 1.08 (0.56 to 2.10)  | 0.8141 |
| 3421_54  | TNFSF8    | IVW        | 21 | CD30 Ligand | Tumor necrosis factor ligand superfamily member 8     | Tumor necrosis factor | 0.98 (0.67 to 1.42)  | 0.9053 |
| 3730_81  | TNFRSF4   | IVW        | 2  | TNR4        | Tumor necrosis factor receptor superfamily member 4   | Tumor necrosis factor | 1.12 (0.20 to 6.14)  | 0.8967 |

|         |           |            |    |               |                                                       |                       |                     |        |
|---------|-----------|------------|----|---------------|-------------------------------------------------------|-----------------------|---------------------|--------|
| 4703_87 | LTA       | IVW        | 3  | TNF-b         | Lymphotoxin-alpha                                     | Tumor necrosis factor | 1.24 (0.39 to 3.88) | 0.7158 |
| 4832_75 | TNFRSF10A | IVW        | 2  | TRAIL R1      | Tumor necrosis factor receptor superfamily member 10A | Tumor necrosis factor | 0.56 (0.06 to 4.88) | 0.5991 |
| 5036_50 | TNFAIP6   | IVW        | 78 | TSG-6         | Tumor necrosis factor-inducible gene 6 protein        | Tumor necrosis factor | 1.02 (0.87 to 1.20) | 0.7640 |
| 5070_76 | TNFRSF6B  | IVW        | 3  | DcR3          | Tumor necrosis factor receptor superfamily member 6B  | Tumor necrosis factor | 0.87 (0.22 to 3.39) | 0.8359 |
| 5131_15 | TNFRSF19  | IVW        | 4  | TAJ           | Tumor necrosis factor receptor superfamily member 19  | Tumor necrosis factor | 0.50 (0.23 to 1.09) | 0.0825 |
| 5138_50 | TNFRSF12A | Wald ratio | 1  | TWEAKR        | Tumor necrosis factor receptor superfamily member 12A | Tumor necrosis factor | 0.25 (0.02 to 3.57) | 0.3083 |
| 5352_11 | TNFRSF14  | IVW        | 2  | HVEM          | Tumor necrosis factor receptor superfamily member 14  | Tumor necrosis factor | 1.29 (0.41 to 4.00) | 0.6634 |
| 5355_69 | TNFSF14   | IVW        | 6  | LIGHT         | Tumor necrosis factor ligand superfamily member 14    | Tumor necrosis factor | 0.90 (0.41 to 1.96) | 0.7907 |
| 5383_14 | TNFRSF13C | IVW        | 4  | BAFF Receptor | Tumor necrosis factor receptor superfamily member 13C | Tumor necrosis factor | 0.82 (0.44 to 1.54) | 0.5434 |
| 5404_53 | TNFRSF21  | IVW        | 17 | DR6           | Tumor necrosis factor receptor superfamily member 21  | Tumor necrosis factor | 0.81 (0.49 to 1.32) | 0.3906 |
| 5534_49 | TNFRSF10B | IVW        | 7  | TRAIL R2      | Tumor necrosis factor receptor superfamily member 10B | Tumor necrosis factor | 0.89 (0.49 to 1.62) | 0.7099 |
| 5936_53 | TNF       | IVW        | 3  | TNF-a         | Tumor necrosis factor                                 | Tumor necrosis factor | 1.11 (0.26 to 4.73) | 0.8889 |
| 5939_42 | TNFSF12   | IVW        | 18 | TWEAK         | Tumor necrosis factor ligand superfamily member 12    | Tumor necrosis factor | 1.01 (0.71 to 1.44) | 0.9639 |
| 8304_50 | TNFRSF11B | IVW        | 26 | OPG           | Tumor necrosis factor receptor superfamily member 11B | Tumor necrosis factor | 1.13 (0.67 to 1.89) | 0.6539 |
| 8833_20 | TNFSF10   | IVW        | 5  | TRAIL         | Tumor necrosis factor ligand superfamily member 10    | Tumor necrosis factor | 1.08 (0.45 to 2.60) | 0.8602 |

\* protein ID in the Nat Genet. 2021;53(12):1712-21

Table S4. Associations of inflammatory traits with liver cancer (UKBB) according to Mendelian randomization analysis.

| Inflammatory trait           | method | No. of IVs | Biomarker | Full name                | Group                               | lower       | OR          | upper       | P value      |
|------------------------------|--------|------------|-----------|--------------------------|-------------------------------------|-------------|-------------|-------------|--------------|
| C-reactive protein           | IVW    | 287        |           |                          | Circulating inflammatory biomarkers | 0.87        | 1.14        | 1.61        | 0.155        |
| Neutrophil count             | IVW    | 161        |           |                          | Circulating inflammatory biomarkers | 0.78        | 1.25        | 1.93        | 0.149        |
| Leukocyte count              | IVW    | 183        |           |                          | Circulating inflammatory biomarkers | 0.52        | 1.02        | 1.28        | 0.167        |
| Monocyte count               | IVW    | 259        |           |                          | Circulating inflammatory biomarkers | 0.53        | 0.98        | 1.42        | 0.370        |
| Eosinophil count             | IVW    | 204        |           |                          | Circulating inflammatory biomarkers | 0.51        | 1.15        | 1.61        | 0.376        |
| Lymphocyte count             | IVW    | 185        |           |                          | Circulating inflammatory biomarkers | 0.62        | 0.94        | 1.29        | 0.788        |
| Basophil count               | IVW    | 80         |           |                          | Circulating inflammatory biomarkers | 0.79        | 0.95        | 1.23        | 0.795        |
| Type 1 diabetes              | IVW    | 130        |           |                          | Immune-mediated diseases            | 0.67        | 1.04        | 1.11        | 0.106        |
| Multiple sclerosis           | IVW    | 53         |           |                          | Immune-mediated diseases            | 0.51        | 1.05        | 1.62        | 0.252        |
| Rheumatoid arthritis         | IVW    | 117        |           |                          | Immune-mediated diseases            | 0.64        | 1.04        | 1.43        | 0.321        |
| Asthma                       | IVW    | 224        |           |                          | Immune-mediated diseases            | 0.61        | 1.07        | 1.34        | 0.456        |
| Crohn's disease              | IVW    | 106        |           |                          | Immune-mediated diseases            | 0.82        | 1.29        | 1.91        | 0.457        |
| Ulcerative colitis           | IVW    | 76         |           |                          | Immune-mediated diseases            | 0.83        | 1.02        | 1.52        | 0.525        |
| Psoriasis                    | IVW    | 84         |           |                          | Immune-mediated diseases            | 0.68        | 1.17        | 1.41        | 0.560        |
| Celiac disease               | IVW    | 11         |           |                          | Immune-mediated diseases            | 0.56        | 0.89        | 1.25        | 0.778        |
| Systemic lupus erythematosus | IVW    | 47         |           |                          | Immune-mediated diseases            | 0.44        | 1.02        | 1.76        | 0.254        |
| <b>CXCL17</b>                | IVW    | 8          | VCC1      | C-X-C motif chemokine 17 | Chemokine                           | <b>1.06</b> | <b>1.45</b> | <b>1.79</b> | <b>0.011</b> |
| CCL25                        | IVW    | 56         | TECK      | C-C motif chemokine 25   | Chemokine                           | 0.46        | 1.06        | 1.52        | 0.099        |
| CCL17                        | IVW    | 44         | TARC      | C-C motif chemokine 17   | Chemokine                           | 0.52        | 1.16        | 1.38        | 0.525        |
| CCL5                         | IVW    | 13         | RANTES    | C-C motif chemokine 5    | Chemokine                           | 0.91        | 1.21        | 1.83        | 0.168        |
| CCL18                        | IVW    | 48         | PARC      | C-C motif chemokine 18   | Chemokine                           | 0.96        | 1.49        | 1.71        | 0.447        |
| CCL23                        | IVW    | 25         | MPIF-1    | C-C motif chemokine 23   | Chemokine                           | 0.47        | 1.11        | 1.15        | 0.427        |
| CCL15                        | IVW    | 54         | MIP-5     | C-C motif chemokine 15   | Chemokine                           | 0.35        | 1.15        | 1.33        | 0.686        |
| CCL19                        | IVW    | 26         | MIP-3b    | C-C motif chemokine 19   | Chemokine                           | 0.27        | 0.84        | 1.68        | 0.058        |
| CCL3                         | IVW    | 11         | MIP-1a    | C-C motif chemokine 3    | Chemokine                           | 0.66        | 0.95        | 1.08        | 0.761        |
| <b>CXCL9</b>                 | IVW    | 4          | MIG       | C-X-C motif chemokine 9  | Chemokine                           | 0.26        | 1.24        | 1.90        | 0.210        |

|                |            |    |                 |                                               |               |      |      |      |       |
|----------------|------------|----|-----------------|-----------------------------------------------|---------------|------|------|------|-------|
| <b>CCL22</b>   | IVW        | 33 | MDC             | C-C motif chemokine 22                        | Chemokine     | 0.53 | 0.85 | 1.81 | 0.945 |
| <b>CCL13</b>   | IVW        | 2  | MCP-4           | C-C motif chemokine 13                        | Chemokine     | 0.53 | 0.91 | 1.22 | 0.519 |
| <b>CCL7</b>    | IVW        | 42 | MCP-3           | C-C motif chemokine 7                         | Chemokine     | 0.43 | 0.90 | 1.05 | 0.261 |
| <b>CCL8</b>    | IVW        | 81 | MCP-2           | C-C motif chemokine 8                         | Chemokine     | 0.45 | 0.97 | 1.74 | 0.983 |
| <b>CCL2</b>    | IVW        | 4  | MCP-1           | C-C motif chemokine 2                         | Chemokine     | 0.88 | 1.03 | 1.45 | 0.171 |
| <b>CCL4L1</b>  | IVW        | 11 | LAG-1           | C-C motif chemokine 4-like                    | Chemokine     | 0.79 | 1.12 | 1.27 | 0.589 |
| <b>CXCL11</b>  | IVW        | 36 | I-TAC           | C-X-C motif chemokine 11                      | Chemokine     | 0.85 | 1.33 | 1.72 | 0.993 |
| <b>CXCL10</b>  | IVW        | 11 | IP-10           | C-X-C motif chemokine 10                      | Chemokine     | 0.83 | 1.14 | 1.60 | 0.436 |
| <b>CCL1</b>    | IVW        | 22 | I-309           | C-C motif chemokine 1                         | Chemokine     | 0.62 | 1.10 | 1.27 | 0.523 |
| <b>CCL16</b>   | IVW        | 64 | HCC-4           | C-C motif chemokine 16                        | Chemokine     | 0.47 | 0.98 | 1.35 | 0.236 |
| <b>CCL14</b>   | IVW        | 30 | HCC-1           | C-C motif chemokine 14                        | Chemokine     | 0.71 | 1.36 | 1.50 | 0.234 |
| <b>CXCL6</b>   | IVW        | 70 | GCP-2           | C-X-C motif chemokine 6                       | Chemokine     | 0.46 | 1.24 | 1.48 | 0.989 |
| <b>CCL26</b>   | IVW        | 7  | Eotaxin-3       | C-C motif chemokine 26                        | Chemokine     | 0.41 | 1.24 | 1.65 | 0.101 |
| <b>CCL11</b>   | IVW        | 28 | Eotaxin         | Eotaxin                                       | Chemokine     | 0.27 | 1.28 | 1.84 | 0.165 |
| <b>CXCL5</b>   | IVW        | 8  | ENA-78          | C-X-C motif chemokine 5                       | Chemokine     | 0.26 | 1.12 | 1.40 | 0.745 |
| <b>CXCL16</b>  | IVW        | 41 | CXCL16, soluble | C-X-C motif chemokine 16                      | Chemokine     | 0.44 | 0.88 | 1.12 | 0.621 |
| <b>CCL27</b>   | IVW        | 2  | CTACK           | C-C motif chemokine 27                        | Chemokine     | 0.24 | 1.15 | 1.93 | 0.573 |
| <b>CXCL14</b>  | Wald ratio | 1  | BRAX            | C-X-C motif chemokine 14                      | Chemokine     | 0.41 | 1.40 | 1.96 | 0.906 |
| <b>CXCL13</b>  | IVW        | 4  | BLC             | C-X-C motif chemokine 13                      | Chemokine     | 0.58 | 0.54 | 1.53 | 0.310 |
| <b>CCL21</b>   | IVW        | 56 | 6Ckine          | C-C motif chemokine 21                        | Chemokine     | 0.24 | 0.88 | 1.98 | 0.893 |
| <b>FIGF</b>    | IVW        | 6  | VEGF-D          | Vascular endothelial growth factor D          | Growth factor | 0.83 | 1.11 | 1.27 | 0.684 |
| <b>VEGFC</b>   | Wald ratio | 1  | VEGF-C          | Vascular endothelial growth factor C          | Growth factor | 0.57 | 1.25 | 1.82 | 0.031 |
| <b>VEGFB</b>   | Wald ratio | 1  | VEGF-B          | Vascular endothelial growth factor B          | Growth factor | 0.76 | 1.11 | 1.39 | 0.069 |
| <b>KDR</b>     | IVW        | 42 | VEGF sR2        | Vascular endothelial growth factor receptor 2 | Growth factor | 0.75 | 1.23 | 1.93 | 0.559 |
| <b>FLT1</b>    | IVW        | 27 | VEGF sR1        | Vascular endothelial growth factor receptor 1 | Growth factor | 0.45 | 1.24 | 1.79 | 0.388 |
| <b>VEGFA</b>   | IVW        | 51 | VEGF            | Vascular endothelial growth factor A          | Growth factor | 0.88 | 1.16 | 1.99 | 0.499 |
| <b>CLEC11A</b> | IVW        | 40 | SCGF-beta       | Stem cell growth factor-beta                  | Growth factor | 0.58 | 0.88 | 1.37 | 0.375 |
| <b>HGFAC</b>   | IVW        | 66 | HGFA            | Hepatocyte growth factor activator            | Growth factor | 0.92 | 1.38 | 1.95 | 0.621 |
| <b>HGF</b>     | IVW        | 6  | HGF             | Hepatocyte growth factor                      | Growth factor | 0.94 | 1.25 | 1.27 | 0.308 |

|               |            |           |               |                                            |                      |             |             |             |              |
|---------------|------------|-----------|---------------|--------------------------------------------|----------------------|-------------|-------------|-------------|--------------|
| <b>FGFRL1</b> | IVW        | 4         | FGRL1         | Fibroblast growth factor receptor-like 1   | Growth factor        | 0.42        | 1.14        | 1.80        | 0.664        |
| <b>FGFR4</b>  | IVW        | 6         | FGFR4         | Fibroblast growth factor receptor 4        | Growth factor        | 0.28        | 0.98        | 1.48        | 0.331        |
| <b>FGFR3</b>  | <b>IVW</b> | <b>11</b> | <b>FGFR-3</b> | <b>Fibroblast growth factor receptor 3</b> | <b>Growth factor</b> | <b>1.03</b> | <b>1.23</b> | <b>1.41</b> | <b>0.039</b> |
| <b>FGFR2</b>  | IVW        | 2         | FGFR-2        | Fibroblast growth factor receptor 2        | Growth factor        | 0.79        | 0.95        | 1.14        | 0.270        |
| <b>FGFBP3</b> | IVW        | 18        | FGFP3         | Fibroblast growth factor-binding protein 3 | Growth factor        | 0.61        | 0.98        | 1.29        | 0.801        |
| <b>FGFBP1</b> | IVW        | 9         | FGFP1         | Fibroblast growth factor-binding protein 1 | Growth factor        | 0.78        | 1.08        | 1.31        | 0.801        |
| <b>FGF8</b>   | IVW        | 2         | FGF-8F        | Fibroblast growth factor 8 isoform F       | Growth factor        | 0.56        | 1.14        | 1.28        | 0.797        |
| <b>FGF7</b>   | IVW        | 3         | FGF7          | Fibroblast growth factor 7                 | Growth factor        | 0.85        | 1.05        | 1.30        | 0.829        |
| <b>FGF5</b>   | IVW        | 4         | FGF-5         | Fibroblast growth factor 5                 | Growth factor        | 0.75        | 1.01        | 1.34        | 0.204        |
| <b>FGF4</b>   | Wald ratio | 1         | FGF-4         | Fibroblast growth factor 4                 | Growth factor        | 0.35        | 1.00        | 1.14        | 0.666        |
| <b>FGF3</b>   | IVW        | 3         | FGF-3         | Fibroblast growth factor 3                 | Growth factor        | 0.90        | 1.11        | 1.83        | 0.821        |
| <b>FGF23</b>  | IVW        | 2         | FGF23         | Fibroblast growth factor 23                | Growth factor        | 0.87        | 1.42        | 1.97        | 0.765        |
| <b>FGF20</b>  | IVW        | 3         | FGF-20        | Fibroblast growth factor 20                | Growth factor        | 0.70        | 1.09        | 1.67        | 0.727        |
| <b>FGF19</b>  | IVW        | 11        | FGF-19        | Fibroblast growth factor 19                | Growth factor        | 0.60        | 1.14        | 1.33        | 0.458        |
| <b>FGF18</b>  | Wald ratio | 1         | FGF-18        | Fibroblast growth factor 18                | Growth factor        | 0.57        | 1.03        | 1.40        | 0.423        |
| <b>FGF17</b>  | IVW        | 6         | FGF-17        | Fibroblast growth factor 17                |                      |             |             |             |              |
